# Supplementary material
Source: HighWire-hosted journal article supplement (https://drc.bmj.com/content/7/1/e000809)
Supplement: inline-supplementary-material-3 [file inline-supplementary-material-3.pdf]

## Supplement 3

## Supplement 3a. Course of the disease burden among persons with T1DM

|                                                                   |           | Baseline          | 6 months             | 12 months            | Difference (12 months) |
|-------------------------------------------------------------------|-----------|-------------------|----------------------|----------------------|------------------------|
| <b>SF-12<sup>v2</sup></b>                                         |           |                   |                      |                      |                        |
| PCS                                                               | Observed  | 51.3 [46.1, 54.7] | 52.1 [47.4, 55.1] ** | 51.8 [47.2, 55.1] ** |                        |
|                                                                   | Number    | 1051              | 836                  | 537                  |                        |
|                                                                   | Estimated | 49.8 (49.3, 50.2) | 50.5 (50.1, 51.0)    | 50.2 (49.5, 50.7)    | 0.4 (-0.5, 1.3)        |
| MCS                                                               | Observed  | 49.6 [40.8, 56.4] | 51.1 [43.4, 57.6] ** | 52.7 [45.1, 58.8] ** |                        |
|                                                                   | Number    | 1051              | 836                  | 537                  |                        |
|                                                                   | Estimated | 48.1 (47.5, 48.7) | 50.0 (49.3, 50.7)    | 51.5 (50.6, 52.3)    | 3.4 (2.1, 4.7)         |
| <b>EQ-5D-3L</b>                                                   |           |                   |                      |                      |                        |
| Dutch Tariff                                                      | Observed  | 0.84 [0.77, 1.00] | 0.90 [0.81, 1.00] ** | 0.90 [0.81, 1.00] ** |                        |
|                                                                   | Number    | 1051              | 837                  | 537                  |                        |
|                                                                   | Estimated | 0.84 (0.83, 0.85) | 0.87 (0.86, 0.88)    | 0.87 (0.85, 0.88)    | 0.03 (0.01, 0.05)      |
| VAS                                                               | Observed  | 73.0 [62.0, 81.2] | 76.0 [68.5, 82.0] *  | 79.0 [69.0, 85.0] *  |                        |
|                                                                   | Number    | 1052              | 837                  | 537                  |                        |
|                                                                   | Estimated | 69.9 (68.7, 71.1) | 72.1 (70.8, 73.5)    | 73.2 (71.5, 74.9)    | 3.3 (0.8, 5.8)         |
| <b>Hypoglycaemic events</b>                                       |           |                   |                      |                      |                        |
| Presence of any hypoglycaemic events in past 6 months, yes, n (%) |           | 1017 (96.8)       | 803 (95.9)           | 504 (93.9) **        |                        |
|                                                                   | Number    | 1051              | 837                  | 537                  |                        |
| Number of hypoglycaemic events in past 6 months, n (%)            | Observed  | 40.0 [12.5, 80.0] | 30.0 [12.0, 80.0]    | 28.0 [12.0, 75.0]    |                        |
|                                                                   | Number    | 1013              | 799                  | 503                  |                        |
|                                                                   | Estimated | 60.2 (55.6, 64.7) | 58.3 (53.3, 63.4)    | 61.3 (54.8, 67.7)    | 1.1 (-8.5, 10.7)       |
| <b>Use of strips</b>                                              |           |                   |                      |                      |                        |
| Strips per day, n (%)                                             | Observed  | 6.0 [4.0, 8.0]    | 5.0 [1.0, 7.0] **    | 3.0 [0.0, 6.0] **    |                        |

|                                                  |           |                       |                       |                       |                    |
|--------------------------------------------------|-----------|-----------------------|-----------------------|-----------------------|--------------------|
|                                                  | Number    | 1042                  | 831                   | 537                   |                    |
|                                                  | Estimated | 6.2 (6.0, 6.4)        | 4.9 (4.7, 5.2)        | 4.0 (3.6, 4.3)        | -2.2 (-2.7, -1.7)  |
| <b>Hospital admissions</b>                       |           |                       |                       |                       |                    |
| Hospital admissions in past 6 months, yes, n (%) |           | 144 (13.7)            | 72 (8.6) **           | 22 (2.1) **           |                    |
|                                                  | Number    | 1051                  | 834                   | 535                   |                    |
| Number of hospital admissions (days)             | Observed  | <b>0.0 [0.0, 0.0]</b> | <b>0.0 [0.0, 0.0]</b> | <b>0.0 [0.0, 0.0]</b> |                    |
|                                                  | Number    | 1051                  | 834                   | 535                   |                    |
|                                                  | Estimated | 0.3 (0.2, 0.4)        | 0.3 (0.1, 0.3)        | 0.1 (-0.1, 0.2)       | -0.2 (-0.4, 0.1)   |
| <b>Loss of working days</b>                      |           |                       |                       |                       |                    |
| Absenteeism rate in past 6 months, yes, n (%)    |           | 192 (18.3)            | 84 (10.0) **          | 42 (7.8) **           |                    |
|                                                  | Number    | 1051                  | 837                   | 537                   |                    |
| Number of working days lost in last 6 months     | Observed  | 7.0 [3.0, 27.0]       | 9.0 [3.0, 30.0]       | 10.0 [2.5, 80.0]      |                    |
|                                                  | Number    | 190                   | 79                    | 41                    |                    |
|                                                  | Estimated | 35.2 (26.6, 43.8)     | 38.1 (24.8, 51.4)     | 47.2 (28.8, 65.7)     | 12.0 (-12.9, 37.0) |

Values are presented as number (%), median [25th, 75th percentile] and estimated mean (difference) (95% CI). Data are presented as observed data and estimated data using the linear mixed model. \* P<0.05 as compared to baseline; \*\* p<0.001 as compared to baseline. Abbreviations: PCS, Physical component score; MCS, Mental component score.

## Supplement 3b. Course of the disease burden among persons with T2DM

|                                                                   |           | Baseline          | 6 months            | 12 months           | Difference (12 months) |
|-------------------------------------------------------------------|-----------|-------------------|---------------------|---------------------|------------------------|
| <b>SF-12<sup>v2</sup></b>                                         |           |                   |                     |                     |                        |
| PCS                                                               | Observed  | 45.7 [39.1, 51.2] | 46.3 [37.8, 51.6]   | 46.8 [40.9, 51.4]   |                        |
|                                                                   | Number    | 221               | 154                 | 98                  |                        |
|                                                                   | Estimated | 44.5 (43.4, 45.7) | 44.4 (43.0, 45.8)   | 45.1 (43.4, 46.9)   | 0.6 (-1.9, 3.1)        |
| MCS                                                               | Observed  | 47.9 [48.5, 55.7] | 49.7 [41.8, 57.3] * | 50.5 [44.9, 57.8] * |                        |
|                                                                   | Number    | 221               | 154                 | 98                  |                        |
|                                                                   | Estimated | 46.9 (45.5, 48.3) | 48.9 (47.2, 50.6)   | 50.5 (48.3, 52.6)   | 3.6 (0.5, 6.7)         |
| <b>EQ5D-3L</b>                                                    |           |                   |                     |                     |                        |
| Dutch Tariff                                                      | Observed  | 0.81 [0.69, 0.95] | 0.84 [0.71, 1.00]   | 0.81 [0.73, 1.00]   |                        |
|                                                                   | Number    | 221               | 154                 | 98                  |                        |
|                                                                   | Estimated | 0.76 (0.72, 0.79) | 0.77 (0.73, 0.81)   | 0.78 (0.72, 0.83)   | 0.02 (-0.06, 0.09)     |
| VAS                                                               | Observed  | 68.0 [50.0, 80.0] | 71.0 [60.0, 80.0]   | 71.0 [61.0, 81.2]   |                        |
|                                                                   | Number    | 221               | 155                 | 98                  |                        |
|                                                                   | Estimated | 62.4 (59.4, 65.4) | 66.0 (62.4, 69.6)   | 67.7 (63.2, 72.3)   | 5.3 (-1.4, 12.0)       |
| <b>Hypoglycaemic events</b>                                       |           |                   |                     |                     |                        |
| Presence of any hypoglycaemic events in past 6 months, yes, n (%) |           | 169 (76.5)        | 114 (74.0)          | 77 (77.8)           |                        |
|                                                                   | Number    | 221               | 154                 | 99                  |                        |
| Number of hypoglycaemic events in past 6 months, n (%)            | Observed  | 12.0 [6.0, 30.0]  | 15.0 [6.0, 48.0]    | 20.0 [6.5, 45.0]    |                        |
|                                                                   | Number    | 169               | 114                 | 77                  |                        |
|                                                                   | Estimated | 25.9 (19.4, 32.3) | 34.8 (26.9, 42.6)   | 32.6 (23.1, 42.2)   | 6.7 (-7.4, 20.8)       |
| <b>Use of strips</b>                                              |           |                   |                     |                     |                        |

|                                                  |               |                   |                   |                    |                     |
|--------------------------------------------------|---------------|-------------------|-------------------|--------------------|---------------------|
| Strips per day, n (%)                            | Observed      | 5.0 [1.0, 7.0]    | 5.0 [1.0, 7.0] ** | 3.0 [0.0, 6.0] **  |                     |
|                                                  | Number        | 220               | 153               | 99                 |                     |
|                                                  | Estimated     | 5.7 (5.2, 6.2)    | 5.0 (4.4, 5.6)    | 3.7 (2.9, 4.4)     | -2.0 (-3.1, -1.0)   |
| <b>Hospital admissions</b>                       |               |                   |                   |                    |                     |
| Hospital admissions in past 6 months, yes, n (%) |               | 29 (13.0)         | 19 (8.5)          | 7 (7.2)            |                     |
|                                                  | <b>Number</b> | 223               | 151               | 97                 |                     |
| Number of hospital admissions (days)             | Observed      | 0.0 [0.0, 0.0]    | 0.0 [0.0, 0.0]    | 0.0 [0.0, 0.0]     |                     |
|                                                  | Number        | 217               | 151               | 97                 |                     |
|                                                  | Estimated     | 0.4 (-0.1, 0.8)   | 0.6 (0.1, 1.1)    | 0.2 (-0.5, 0.8)    | -0.2 (-1.1, 0.7)    |
| <b>Loss of working days</b>                      |               |                   |                   |                    |                     |
| Absenteeism rate in past 6 months, yes, n (%)    |               | 42 (19.0)         | 15 (9.7) **       | 6 (6.1) *          |                     |
|                                                  | Number        | 221               | 154               | 99                 |                     |
| Number of working days lost in last 6 months     | Observed      | 9.0 [3.3, 35.0]   | 6.0 [5.0, 75.5]   | 17.0 [3.25, 36.8]  |                     |
|                                                  | Number        | 42                | 15                | 6                  |                     |
|                                                  | Estimated     | 32.3 (15.7, 48.9) | 42.2 (13.1, 71.4) | 19.0 (-33.6, 71.6) | -13.3 (-81.3, 54.6) |

Values are presented as number (%), median [25th, 75th percentile] and estimated mean (difference) (95% CI). Data are presented as observed data and estimated data using the linear mixed model. \* P<0.05 as compared to baseline; \*\* p<0.001 as compared to baseline. Abbreviations: PCS, Physical component score; MCS, Mental component score.
